# Supplementary material for: Microrna expression signatures predict patient progression and disease outcome in pediatric embryonal central nervous system neoplasms
Source: J Hematol Oncol. 2014 Dec 31;7:96. doi: 10.1186/s13045-014-0096-y (PMC4342799; doi:10.1186/s13045-014-0096-y)
Supplement: Additional file 2: Table S1. — Clinical Raw Data. [file 13045_2014_96_MOESM2_ESM.xlsx]

## Sheet: Disease Association
Disease	#Gene	EntrezGene	Statistics
Hematologic Neoplasms	128	693214 442908 693120 574476 494329 100126346 693129 574492 442891 406926 574467 724024 619556 574503 442913 574486 574478 574409 406944 406963 100126315 724023 724030 724022 574488 574031 693159 574442 494331 406974 442914 723779 494337 574482 100126342 100126348 406898 693128 100126307 574489 574463 574500 574477 664614 693212 574474 574408 100126304 574030 574454 407030 442898 442906 406930 442…	C=273;O=128;E=3.87;R=33.09;rawP=1.41e-163;adjP=2.89e-161
Neoplasms	62	407000 406958 406910 406901 407018 442904 406881 407017 406912 406997 407975 406929 3205 407020 27113 406933 406941 407014 693159 406974 406983 406959 406978 406935 406985 406961 407001 406893 406956 407007 442918 406968 407019 442903 407011 114614 406892 406994 406996 406900 407008 406972 406992 406940 574452 406973 494324 406949 442890 407055 406911 407015 406989 407031 406931 406913 406937 407…	C=854;O=62;E=12.10;R=5.12;rawP=7.91e-26;adjP=8.11e-24
Carcinoma, Small Cell	29	407000 406910 406929 407014 693159 406974 406983 406985 406961 407001 406893 407030 407007 407019 442919 406892 406919 406900 406972 494330 406973 494324 406923 407031 406913 406937 407042 407029 406894	C=278;O=29;E=3.94;R=7.36;rawP=8.91e-17;adjP=6.09e-15
cancer or viral infections	48	407000 406958 406910 407018 442904 406881 407017 406997 407975 3205 407020 406933 27113 406941 406983 406959 406978 406935 406985 406961 407001 406893 407007 442918 407011 114614 406892 406996 406900 407008 406972 406992 406940 406973 494324 406911 407055 407015 406989 407031 406931 406913 406937 407042 407021 407029 406950 406955	C=951;O=48;E=13.47;R=3.56;rawP=4.94e-14;adjP=2.53e-12
Muscle Neoplasms	19	100500872 100313840 100500901 100313839 100500808 100500859 100423011 100500831 100500834 100500843 100500803 100500885 100500849 100500835 100422821 100500823 100500898 100422918 100500887	C=148;O=19;E=2.10;R=9.06;rawP=4.41e-13;adjP=1.81e-11
Neoplastic Processes	27	407000 406958 406910 406901 407018 442904 407017 406881 3205 406933 406983 406959 406935 406985 407007 406969 406892 406934 406940 406993 494324 442890 407015 406989 406931 406913 406976	C=411;O=27;E=5.82;R=4.64;rawP=6.28e-11;adjP=2.15e-09
Uterine Cervical Neoplasms	14	407000 100126340 406983 406935 100126326 407001 100126324 407011 406892 100126350 406996 100126328 100126338 100126325	C=121;O=14;E=1.71;R=8.17;rawP=2.14e-09;adjP=6.27e-08
Neoplasm Invasiveness	19	407000 406910 406901 406997 11167 406933 406983 406959 406935 406985 407001 406969 407008 406940 494324 406989 406937 407042 406976	C=298;O=19;E=4.22;R=4.50;rawP=6.86e-08;adjP=1.76e-06
Neoplasm of unspecified nature of digestive system	22	407018 406881 406997 27113 406933 406935 407007 442918 723778 406934 407008 693187 693195 406972 406992 406940 7184 406973 494324 406931 406913 406937	C=445;O=22;E=6.30;R=3.49;rawP=5.44e-07;adjP=1.24e-05
Myosarcoma	11	100500901 100500859 100500808 100500831 100500834 100500803 100500849 100500835 100500823 100500898 406989	C=136;O=11;E=1.93;R=5.71;rawP=4.16e-06;adjP=8.53e-05
Teratoma	7	100302150 100313842 407028 100313780 100302203 100302246 100302133	C=60;O=7;E=0.85;R=8.23;rawP=2.23e-05;adjP=0.0004
Carcinoma	20	407000 406881 406929 406983 406935 406985 407001 406893 407007 442918 406892 406994 406973 494324 406949 407015 406931 406913 406937 407029	C=522;O=20;E=7.40;R=2.70;rawP=6.98e-05;adjP=0.0012
Sarcoma, Kaposi	6	406912 406920 406961 406956 442898 406955	C=55;O=6;E=0.78;R=7.70;rawP=0.0001;adjP=0.0015
Leukemia, Lymphocytic, Chronic, B-Cell	10	407975 27113 8847 407008 100302259 100302113 406911 407021 406950 406955	C=166;O=10;E=2.35;R=4.25;rawP=0.0001;adjP=0.0015
Leukemia, B-Cell	10	407975 27113 8847 407008 100302259 100302113 406911 407021 406950 406955	C=168;O=10;E=2.38;R=4.20;rawP=0.0002;adjP=0.0027
Neoplasms, Glandular and Epithelial	6	100313840 100313839 442913 27113 100313886 100313923	C=65;O=6;E=0.92;R=6.52;rawP=0.0003;adjP=0.0038
Lung Neoplasms	13	406958 406910 406881 9052 406941 406959 406882 494330 406973 442890 406913 406937 407029	C=306;O=13;E=4.34;R=3.00;rawP=0.0005;adjP=0.0057
Urogenital Neoplasms	16	407000 100313840 406881 100313839 406933 406983 406935 406985 407007 442903 407011 406892 406996 406943 406940 406937	C=432;O=16;E=6.12;R=2.61;rawP=0.0005;adjP=0.0057
Arteriosclerosis obliterans	3	407019 406919 406992	C=12;O=3;E=0.17;R=17.65;rawP=0.0006;adjP=0.0062
Gastrointestinal Neoplasms	14	407018 406881 406997 406933 27113 406935 723778 407008 693195 406940 406973 494324 406931 406937	C=354;O=14;E=5.02;R=2.79;rawP=0.0006;adjP=0.0062
Gastrointestinal Diseases	14	407018 406881 406997 406933 27113 406935 723778 407008 693195 406940 406973 494324 406931 406937	C=413;O=14;E=5.85;R=2.39;rawP=0.0026;adjP=0.0254
Colonic Neoplasms	8	406881 406997 406933 406935 406985 407037 406969 406937	C=171;O=8;E=2.42;R=3.30;rawP=0.0032;adjP=0.0279
Ovarian Neoplasms	9	100313840 407018 406881 100313839 406983 268 406985 406996 406977	C=211;O=9;E=2.99;R=3.01;rawP=0.0033;adjP=0.0279
Uterine Neoplasms	7	407000 406881 406935 406985 407001 406996 406943	C=136;O=7;E=1.93;R=3.63;rawP=0.0034;adjP=0.0279
Disorder of uterus NOS	7	407000 406881 406935 406985 407001 406996 406943	C=135;O=7;E=1.91;R=3.66;rawP=0.0032;adjP=0.0279
Carcinoma, Non-Small-Cell Lung	8	406961 407001 406893 406994 442917 494330 406973 406913	C=177;O=8;E=2.51;R=3.19;rawP=0.0039;adjP=0.0307
Leukemia	14	100422992 407975 3205 27113 8847 3214 1025 406934 407008 406942 406911 407021 406950 406955	C=452;O=14;E=6.40;R=2.19;rawP=0.0056;adjP=0.0425
Sezary Syndrome	4	406996 619554 442909 3550	C=52;O=4;E=0.74;R=5.43;rawP=0.0063;adjP=0.0461

## Sheet: Drug Association
Drug	#Gene	EntrezGene	Statistics
tolbutamide	4	494337 494324 494329 494323	C=27;O=4;E=0.38;R=10.46;rawP=0.0005;adjP=0.0050
mecasermin	4	494337 494324 494329 494323	C=27;O=4;E=0.38;R=10.46;rawP=0.0005;adjP=0.0050
terbutaline	2	406921 406994	C=6;O=2;E=0.09;R=23.53;rawP=0.0029;adjP=0.0193
