# Supplementary material for: Microrna expression signatures predict patient progression and disease outcome in pediatric embryonal central nervous system neoplasms
Source: Springer Nature journal article supplement (doi:10.1186/s13045-014-0096-y), 2014-12-01
Supplement: MOESM17 [file 9777354]

| Table 1A. Clinical and demographic data of the patient cohort used in initial analysis | | | | | | | | | | | | |
| --- | --- | --- | --- | --- | --- | --- | --- | --- | --- | --- | --- | --- |
| INITIAL ANALYSIS | ***N*** | **ALL** | **MALES** | **FEMALES** | **MEDULLOBLASTOMA** | **ATRT** | **GERMINOMA** | **CONTROLS** | **MEAN AGE (YEARS)** | **STDEV AGE** | **MEAN AGE (WEEKS)** | **STDEV AGE** |
| **ALL** | 32 |  |  |  |  |  |  | 6.15 | 4.74 | 331.14 | 227.61 |
| **MALES** | 22 |  |  |  |  |  |  | 8.41 | 4.98 | 439.46 | 238.84 |
| **FEMALES** | 10 |  |  |  |  |  |  | 4.12 | 3.42 | 233.65 | 164.39 |
| **UNKNOWN GENDER** | 0 |  |  |  |  |  |  | NaN | NaN | NaN | NaN |
| **MEDULLOBLASTOMA** | 15 | 8 | 7 |  |  |  |  | 7.13 | 4.62 | 378.41 | 221.92 |
| **ATRT** | 4 | 1 | 3 |  |  |  |  | 2.46 | 3.06 | 153.90 | 146.95 |
| **GERMINOMA** | 0 | 0 | 0 |  |  |  |  | NaN | NaN | NaN | NaN |
| **CONTROLS** | 13 | 13 | 0 |  |  |  |  | NaN | NaN | NaN | NaN |
| **FETAL** | 0 | 0 | 0 | 0 | 0 | 0 | 0 | NaN | NaN | NaN | NaN |
| **INFANT** | 3 | 1 | 2 | 1 | 2 | 0 | 0 | 0.34 | 0.30 | 52.53 | 14.18 |
| **CHILD** | 13 | 5 | 8 | 11 | 2 | 0 | 0 | 5.80 | 3.44 | 314.59 | 165.35 |
| **ADOLESCENT** | 3 | 3 | 0 | 3 | 0 | 0 | 0 | 13.45 | 1.85 | 681.48 | 88.71 |
| **ADULT** | 0 | 0 | 0 | 0 | 0 | 0 | 0 | NaN | NaN | NaN | NaN |
|  |  |  |  |  |  |  |  |  |  |  |  |
| **%** | **ALL** | **MALES** | **FEMALES** | **MEDULLOBLASTOMA** | **ATRT** | **GERMINOMA** | **CONTROLS** |  |  |  |  |
| **ALL** | 100.00% |  |  |  |  |  |  |  |  |  |  |
| **MALES** | 68.75% |  |  |  |  |  |  |  |  |  |  |
| **FEMALES** | 31.25% |  |  |  |  |  |  |  |  |  |  |
| **UNKNOWN GENDER** | 0.00% |  |  |  |  |  |  |  |  |  |  |
| **MEDULLOBLASTOMA** | 46.88% | 4.97% | 4.35% |  |  |  |  |  |  |  |  |
| **ATRT** | 12.50% | 0.62% | 1.86% |  |  |  |  |  |  |  |  |
| **GERMINOMA** | 0.00% | 0.00% | 0.00% |  |  |  |  |  |  |  |  |
| **CONTROLS** | 40.63% | 8.07% | 0.00% |  |  |  |  |  |  |  |  |
| **FETAL** | 0.00% | 0.00% | 0.00% | 0.00% | 0.00% | 0.00% | 0.00% |  |  |  |  |
| **INFANT** | 9.38% | 0.62% | 1.24% | 0.62% | 1.24% | 0.00% | 0.00% |  |  |  |  |
| **CHILD** | 40.63% | 3.11% | 4.97% | 6.83% | 1.24% | 0.00% | 0.00% |  |  |  |  |
| **ADOLESCENT** | 9.38% | 1.86% | 0.00% | 1.86% | 0.00% | 0.00% | 0.00% |  |  |  |  |
| **ADULT** | 0.00% | 0.00% | 0.00% | 0.00% | 0.00% | 0.00% | 0.00% |  |  |  |  |

| Table 1B. Clinical and demographic data of the patient cohort used in the Meta-analysis | | | | | | | | | | | | | | | | | | |
| --- | --- | --- | --- | --- | --- | --- | --- | --- | --- | --- | --- | --- | --- | --- | --- | --- | --- | --- |
| META-ANALYSIS | ***N*** | **ALL** | **MALES** | **FEMALES** | **UNKNOWN GENDER** | **MEDULLOBLASTOMA** | **ATRT** | **GERMINOMA** | **CONTROLS** | **MEAN AGE (YEARS)** | | **STDEV AGE** | | **MEAN AGE (WEEKS)** | | | **STDEV AGE** | |
| **ALL** | 161 |  |  |  |  |  |  |  | 4.15 | | 11.91 | | 226.32 | | | 574.91 | |
| **MALES** | 82 |  |  |  |  |  |  |  | 3.85 | | 13.76 | | 210.26 | | | 663.33 | |
| **FEMALES** | 46 |  |  |  |  |  |  |  | 1.09 | | 2.43 | | 76.16 | | | 122.39 | |
| **UNKNOWN GENDER** | 32 |  |  |  |  |  |  |  | 9.20 | | 14.00 | | 476.79 | | | 672.56 | |
| **MEDULLOBLASTOMA** | 19 | 8 | 7 | 4 |  |  |  |  | 6.89 | | 4.13 | | 366.95 | | | 198.43 | |
| **ATRT** | 8 | 1 | 3 | 4 |  |  |  |  | 2.23 | | 2.18 | | 142.95 | | | 104.49 | |
| **GERMINOMA** | 12 | 0 | 0 | 12 |  |  |  |  | 11.15 | | 3.08 | | 571.00 | | | 147.76 | |
| **CONTROLS** | 121 | 73 | 36 | 12 |  |  |  |  | 3.04 | | 13.43 | | 169.45 | | | 647.52 | |
| **FETAL** | 76 | 40 | 32 | 4 | 0 | 0 | 0 | 76 | 0.00 | | 0.00 | | 18.39 | | | 3.41 | |
| **INFANT** | 19 | 15 | 4 | 0 | 1 | 2 | 0 | 16 | 0.56 | | 0.54 | | 62.67 | | | 25.71 | |
| **CHILD** | 40 | 9 | 10 | 21 | 15 | 6 | 9 | 10 | 5.82 | | 3.52 | | 315.53 | | | 168.84 | |
| **ADOLESCENT** | 6 | 3 | 0 | 3 | 3 | 0 | 3 | 0 | 14.07 | | 1.57 | | 711.54 | | | 75.34 | |
| **ADULT** | 5 | 2 | 0 | 3 | 0 | 0 | 0 | 5 | 56.48 | | 29.58 | | 2746.94 | | | 1419.60 | |
|  |  |  |  |  |  |  |  |  |  | |  | |  | | |  | |
| **%** | **ALL** | **MALES** | **FEMALES** | **UNKNOWN GENDER** | **MEDULLOBLASTOMA** | **ATRT** | **GERMINOMA** | **CONTROLS** |  | |  | |  | | |  | |
| **ALL** | 100.00% |  |  |  |  |  |  |  |  | |  | |  | | |  | |
| **MALES** | 50.93% |  |  |  |  |  |  |  |  | |  | |  | | |  | |
| **FEMALES** | 28.57% |  |  |  |  |  |  |  |  | |  | |  | | |  | |
| **UNKNOWN GENDER** | 19.88% |  |  |  |  |  |  |  |  | |  | |  | | |  | |
| **MEDULLOBLASTOMA** | 11.80% | 4.97% | 4.35% | 2.48% |  |  |  |  |  | |  | |  | | |  | |
| **ATRT** | 4.97% | 0.62% | 1.86% | 2.48% |  |  |  |  |  | |  | |  | | |  | |
| **GERMINOMA** | 7.45% | 0.00% | 0.00% | 7.45% |  |  |  |  |  | |  | |  | | |  | |
| **CONTROLS** | 75.16% | 45.34% | 22.36% | 7.45% |  |  |  |  |  | |  | |  | | |  | |
| **FETAL** | 47.20% | 24.84% | 19.88% | 2.48% | 0.00% | 0.00% | 0.00% | 47.20% |  | |  | |  | | |  | |
| **INFANT** | 11.80% | 9.32% | 2.48% | 0.00% | 0.62% | 1.24% | 0.00% | 9.94% |  | |  | |  | | |  | |
| **CHILD** | 24.84% | 5.59% | 6.21% | 13.04% | 9.32% | 3.73% | 5.59% | 6.21% |  | |  | |  | | |  | |
| **ADOLESCENT** | 3.73% | 1.86% | 0.00% | 1.86% | 1.86% | 0.00% | 1.86% | 0.00% |  |  | |  | |  |  | |  |
| **ADULT** | 3.11% | 1.24% | 0.00% | 1.86% | 0.00% | 0.00% | 0.00% | 3.11% |  |  | |  | |  |  | |  |
